# Supplementary material for: Folate conjugated albumin as a targeted nanocarrier for the delivery of fisetin: in silico and in vitro biological studies
Source: Royal Society of Chemistry journal article supplement (doi:10.1039/d3ra08434e), 2024-01-01
Supplement: d3ra08434e1.pdf [file d3ra08434e1.pdf]

**Supplementary files**

**Folate conjugated albumin as a targeted nanocarrier for the delivery of Fisetin: *In-silico* and *in-vitro* biological studies**

Raghu Solanki<sup>1</sup>, Amit Srivastava<sup>2</sup>, Sejal Patel<sup>1</sup>, Sanju Kumari Singh<sup>1</sup>, Bhavana Jodha<sup>1</sup>,  
Umesh Kumar<sup>2,3</sup>, Sunita Patel<sup>1\*</sup>

<sup>1</sup>School of Life Sciences, <sup>2</sup>School of Nano Sciences, Central University of Gujarat,  
Gandhinagar-382030, India

<sup>3</sup>Nutrition Biology Department, School of Interdisciplinary and Applied Sciences, Central  
University of Haryana, Mahendergarh-123031, India

**Correspondence:** Dr. Sunita Patel ([sunitap@cug.ac.in](mailto:sunitap@cug.ac.in))

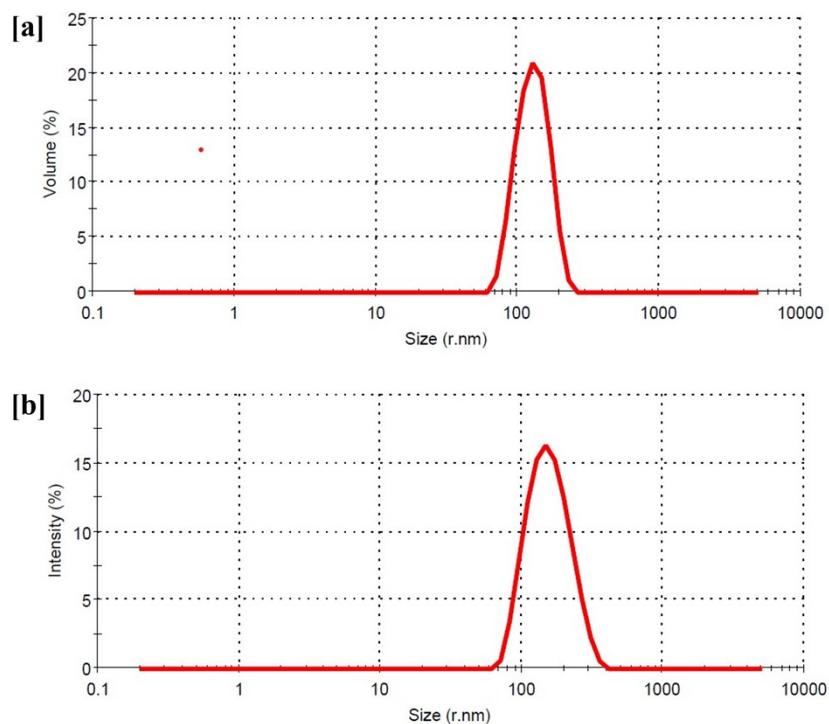

*Figure S1. Hydrodynamic size distribution of CNPs (a) and FNPs (b) determined using DLS.*

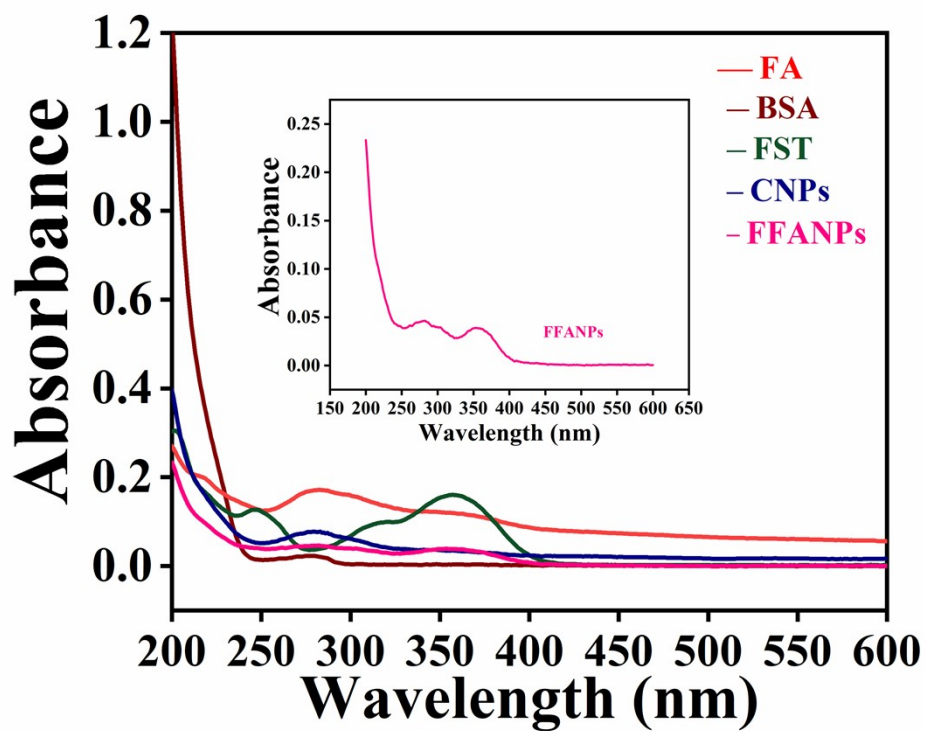

*Figure S2. UV spectrum of FA, BSA, FST, CNPs and FFANPs.*

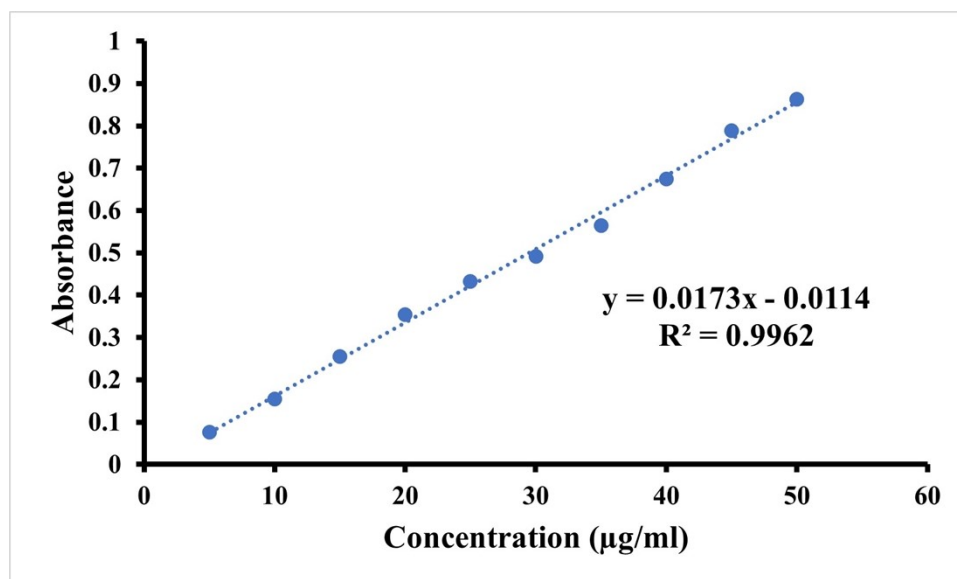

*Figure S3. Standard curve of Folic acid.*

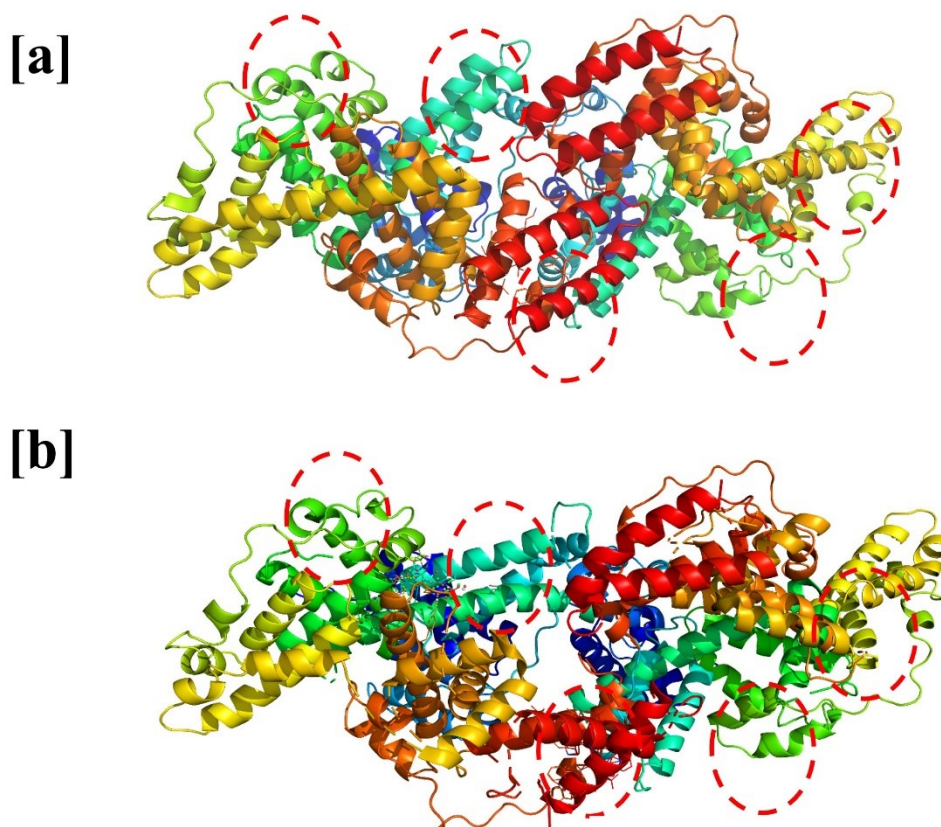

*Figure S4. 3D structural comparison of BSA (a) and BSA/FST/FA complex system (b).*

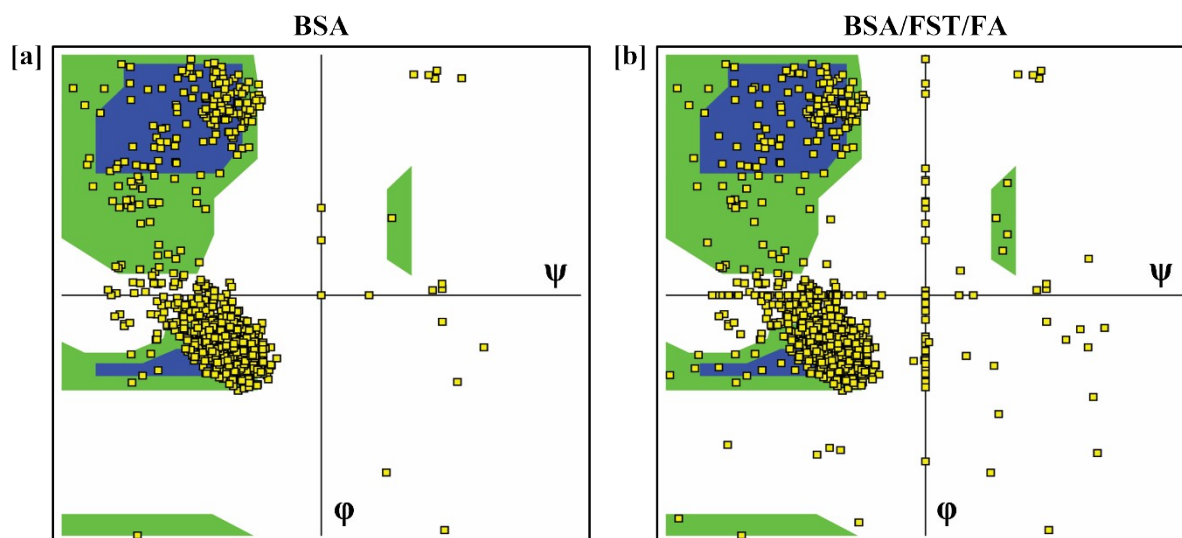

**Figure S5.** Ramachandran plot of BSA (a) and BSA/FST/FA complex (b).

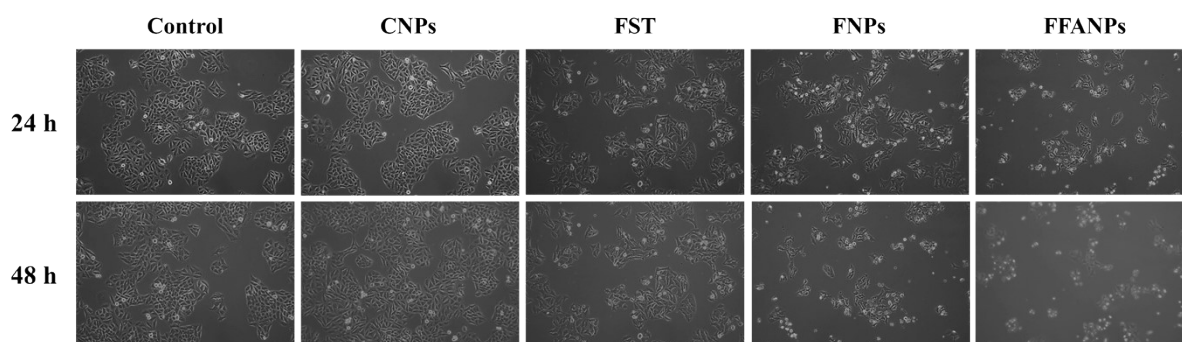

**Figure S6.** Morphological analysis of HeLa cells after treatment with CNPs, FST, FNPs and FFANPs at  $IC_{50}$  concentration dose for 24 h and 48 h.

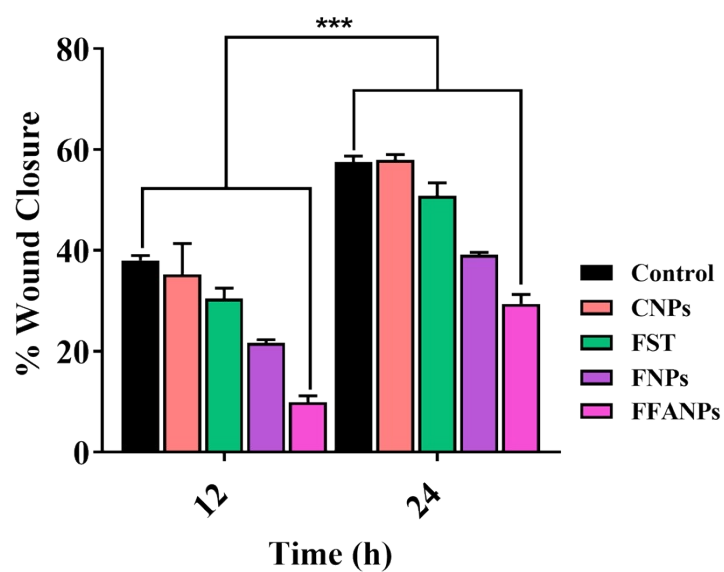

**Figure S7.** Cells were treated with CNPs, FST, FNPs and FFANPs, photographed were captured and % wound closure calculated by using ImageJ software.

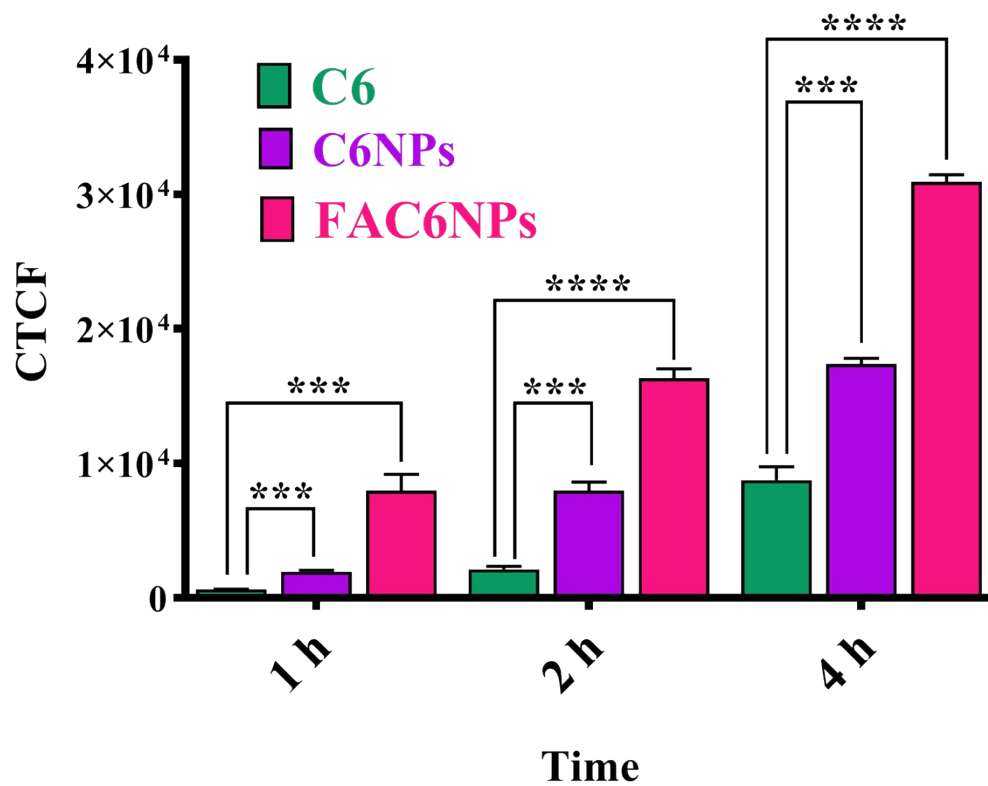

**Figure S8.** Quantitative cellular uptake. CTCF values were calculated from respective fluorescence images of HeLa cells after treatment with C6, C6NPs and FAC6NPs for 1 h, 2 h and 4 h.

**Table S1.** Intermolecular docking score and analysis of BSA amino acid with FST and FA.

| Compound             | Binding Energy<br>(kcal/mol) | Amino Acid            | Types of Bonding                            |
|----------------------|------------------------------|-----------------------|---------------------------------------------|
| <b>BSA/FST</b>       | -8.1                         | GLU-125(A) (3.0,2.7)  | Hydrophobic, $\pi$ – cation                 |
|                      |                              | LYS-136(A) (2.9)      | H-bond                                      |
|                      |                              | LYS-350(B) (2.9)      | H-bond                                      |
|                      |                              | VAL-481 (B) (3.2)     | H-bond                                      |
|                      |                              | LEU-480(B) (3.1)      | H-bond                                      |
| <b>BSA/FA</b>        | -8.8                         | TYR-149(A) (3.0)      | H-bond                                      |
|                      |                              | TYR-156(A) (2.8)      | Hydrophobic, $\pi$ – cation                 |
|                      |                              | LYS-187(A) (2.9)      | Hydrophobic, $\pi$ – $\pi$                  |
|                      |                              | ARG-194(A) (3.0, 3.1) | $\pi$ – cation, $\pi$ – $\pi$ , Hydrophobic |
|                      |                              | ARG-256(A) (3.2, 3.1) | $\pi$ – cation, $\pi$ – $\pi$               |
|                      |                              | GLU-152(B) (2.9)      | H-Bond                                      |
|                      |                              | GLN-220(B) (3.3)      | H-Bond                                      |
|                      |                              | HIS-287(B) (3.2)      | H-bond                                      |
|                      |                              | GLU-339(B) (3.0)      | H-bond                                      |
|                      |                              | TYR-340(B) (2.8)      | H-bond                                      |
|                      |                              | VAL-342(B) (3.3)      | H-bond                                      |
|                      |                              | <b>BSA/FST/FA</b>     | -12.3                                       |
| ARG-435(A) (3.3,3.3) | Hydrophobic, $\pi$ – cation  |                       |                                             |
| TYR-451(A) (2.8)     | H-Bond                       |                       |                                             |
| GLU-186(B) (3.0)     | H-Bond                       |                       |                                             |
| LEU-189(B) (3.3)     | H-Bond                       |                       |                                             |
| SER-192(B) (2.8)     | H-Bond                       |                       |                                             |
| ARG-427(B) (2.8)     | H-Bond                       |                       |                                             |
| THR-518(B) (2.9)     | H-Bond                       |                       |                                             |

**Table S2.** Analysis of BSA/FST/FA complex structure amino acid through Ramachandran Plot.

|                   | <b>Most Favoured Regions [A, B, L] (%)</b> | <b>Additional Allowed Regions [a, b, l, p] (%)</b> | <b>Generously Allowed Region (%)</b> | <b>Disallowed Regions (%)</b> | <b>G-Factor</b> |
|-------------------|--------------------------------------------|----------------------------------------------------|--------------------------------------|-------------------------------|-----------------|
| <b>BSA/FST/FA</b> | 91.6                                       | 5.9                                                | 1.9                                  | 0.6                           | -0.27           |

*Table S3. Analysis of BSA/FST/FA complex structure amino acid through Ramachandran Plot.*

| <b>Free Energy binding (Kcal/mol)</b> | <b>BSA/Fisetin/Folic Acid</b> |
|---------------------------------------|-------------------------------|
| $\Delta E_{\text{electrostatic}}$     | -39.28±0.38                   |
| $\Delta E_{\text{vdw}}$               | -46.87±0.20                   |
| $\Delta G_{\text{GB}}$                | 18.35±0.52                    |
| $\Delta G_{\text{SA}}$                | -22.82±0.87                   |
| $\Delta H$                            | -35.77±0.77                   |
| $-T\Delta S$                          | 19.5±0.33                     |
| $\Delta G$                            | -71.12±0.07                   |
